# Supplementary material for: Reduced immune responses to hepatitis B primary vaccination in obese individuals with nonalcoholic fatty liver disease (NAFLD)
Source: PubMed Central journal article supplement (PMC7801497; doi:10.1038/s41541-020-00266-4), 2021-01-11
Supplement: 41541_2020_266_MOESM1_ESM.pdf [file 41541_2020_266_MOESM1_ESM.pdf]

**Supplementary Table 1: Clinical Data of Patients Who Underwent Liver Biopsy**

| ID/Age/Sex     | Fibroscan (Transient elastography), kPa | Fibrosis score | Controlled Attenuation Parameter (CAP) score, dB/m | NAFLD Activity Score (NAS) (Steatosis + Inflammation +Ballooning) | Anti-HBs (IU/L) |
|----------------|-----------------------------------------|----------------|----------------------------------------------------|-------------------------------------------------------------------|-----------------|
| 4139-0001/47/F | 27.4                                    | 4              | 359                                                | 4 <sup>#</sup>                                                    | 1               |
| 0002-2081/53/F | 17.5                                    | 2              | NA                                                 | 3 (2+1+0)                                                         | 1.6             |
| 0021-2898/52/F | 12                                      | 2              | NA                                                 | 6 (3+2+1)                                                         | 4.7             |
| 0028-8096/56/F | 50.5                                    | 4              | 400                                                | 6 (3+1+2)                                                         | 158.6           |
| 0011-9100/43/M | 16.9                                    | 3              | 183                                                | 3 <sup>#</sup>                                                    | 7               |
| 0032-5927/50/F | 21.3                                    | 3              | 326                                                | 5 (2+2+1)                                                         | 507.4           |
| 0033-3513/24/M | 8.8                                     | 2              | 400                                                | 5 <sup>#</sup>                                                    | 1000            |
| 8931-0005/59/M | 22.3                                    | 3-4            | 400                                                | NA                                                                | 36              |

NA, not available, # breakdown of the NAS score not available

**Supplementary Table 2: List of antibodies used for flow cytometry in the study**

| <b>Antibody used</b>     | <b>Fluorochrome</b>  | <b>Clone</b> | <b>Catalog #</b> | <b>Lot#</b> |
|--------------------------|----------------------|--------------|------------------|-------------|
| Mouse anti-human CD19    | Brilliant Blue 515   | H1B 19       | 564456           | 6014888     |
| Mouse anti-human CD45    | PE-Cy7               | H130         | 557748           | 6091811     |
| Mouse anti- human CD27   | Alexa Fluor 647      | M-T271       | 565116           | 9106651     |
| Mouse anti- human CD3    | Brilliant Violet 605 | SK7          | 563219           | 5083720     |
| Mouse anti-human CD4     | Alexa Fluor 700      | SK3          | 566321           | 8338738     |
| Mouse anti-human CD8     | APC-H7               | SK1          | 560179           | 6140812     |
| Mouse anti- human CD56   | Brilliant Violet 421 | NCAM 16.2    | 562751           | 6007717     |
| Mouse anti- human CD45RA | PE-Cy7               | HI 100       | 562885           | 6231513     |
| Hamster anti-human CCR7  | Alexa Fluor 647      | 3D12         | 565867           | 6070895     |
| Rat anti-human CXCR5     | Alexa-Fluor 647      | RF8B2        | 558113           | 7306668     |
| Mouse anti-human CD4     | PerCP                | SK3          | 566321           | 8338738     |
| Rat anti-mouse CD3       | Brilliant Violet 605 | 17A2         | 564009           | 8059759     |
| Rat anti-mouse CD4       | APC-H7               | GK1.5        | 560181           | 8353964     |

# Supplementary Figure 1

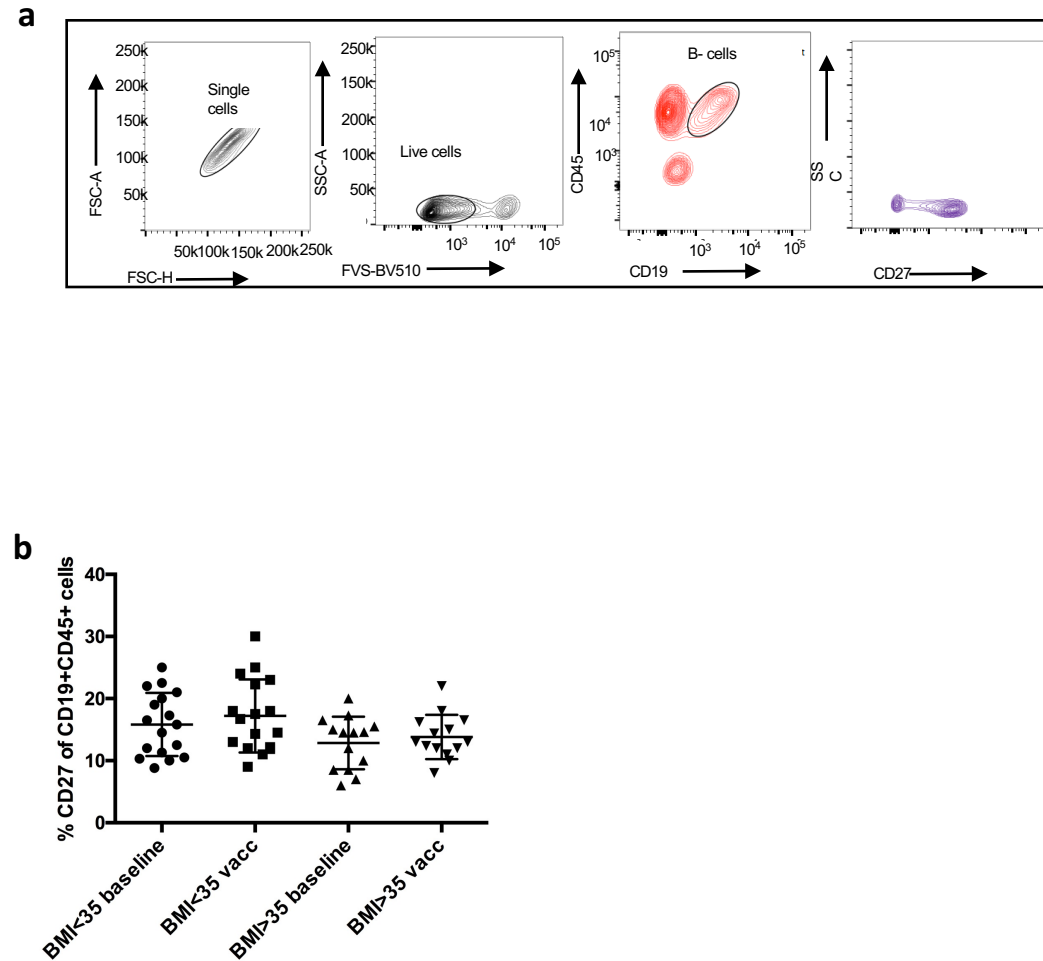

**Analysis of memory B cells in NAFLD patients at baseline and after vaccination.** (a) Gating strategy for memory B cells defined as CD45+CD19+CD27+ cells. (b) Frequency of circulating memory B-cells at baseline and after vaccination was comparable (Kruskal-Wallis test,  $p > 0.05$ ); vacc, vaccination

## Supplementary Figure 2

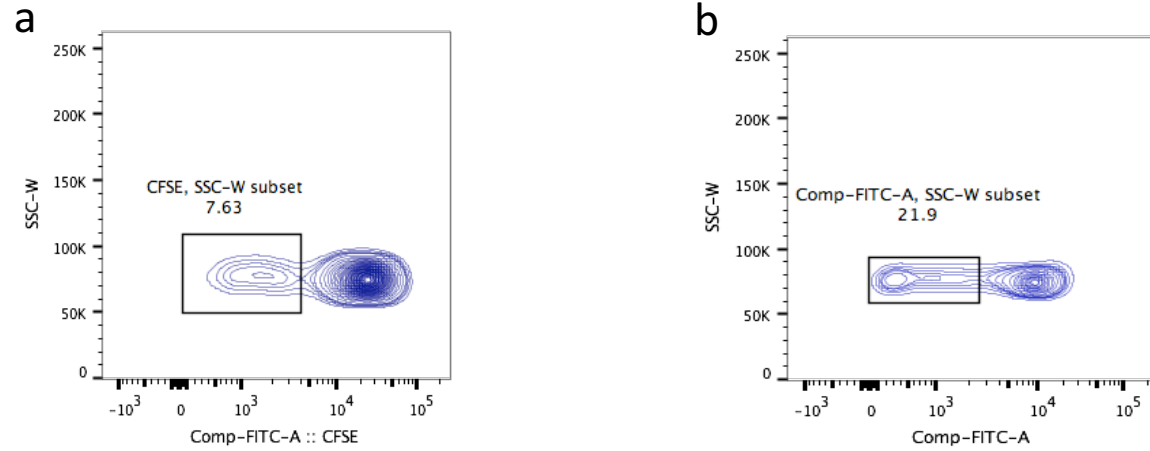

Representative figures showing proliferation of CD8+ T cells in a low risk (a) and high risk obesity class case (b)

Supplementary Figure 3

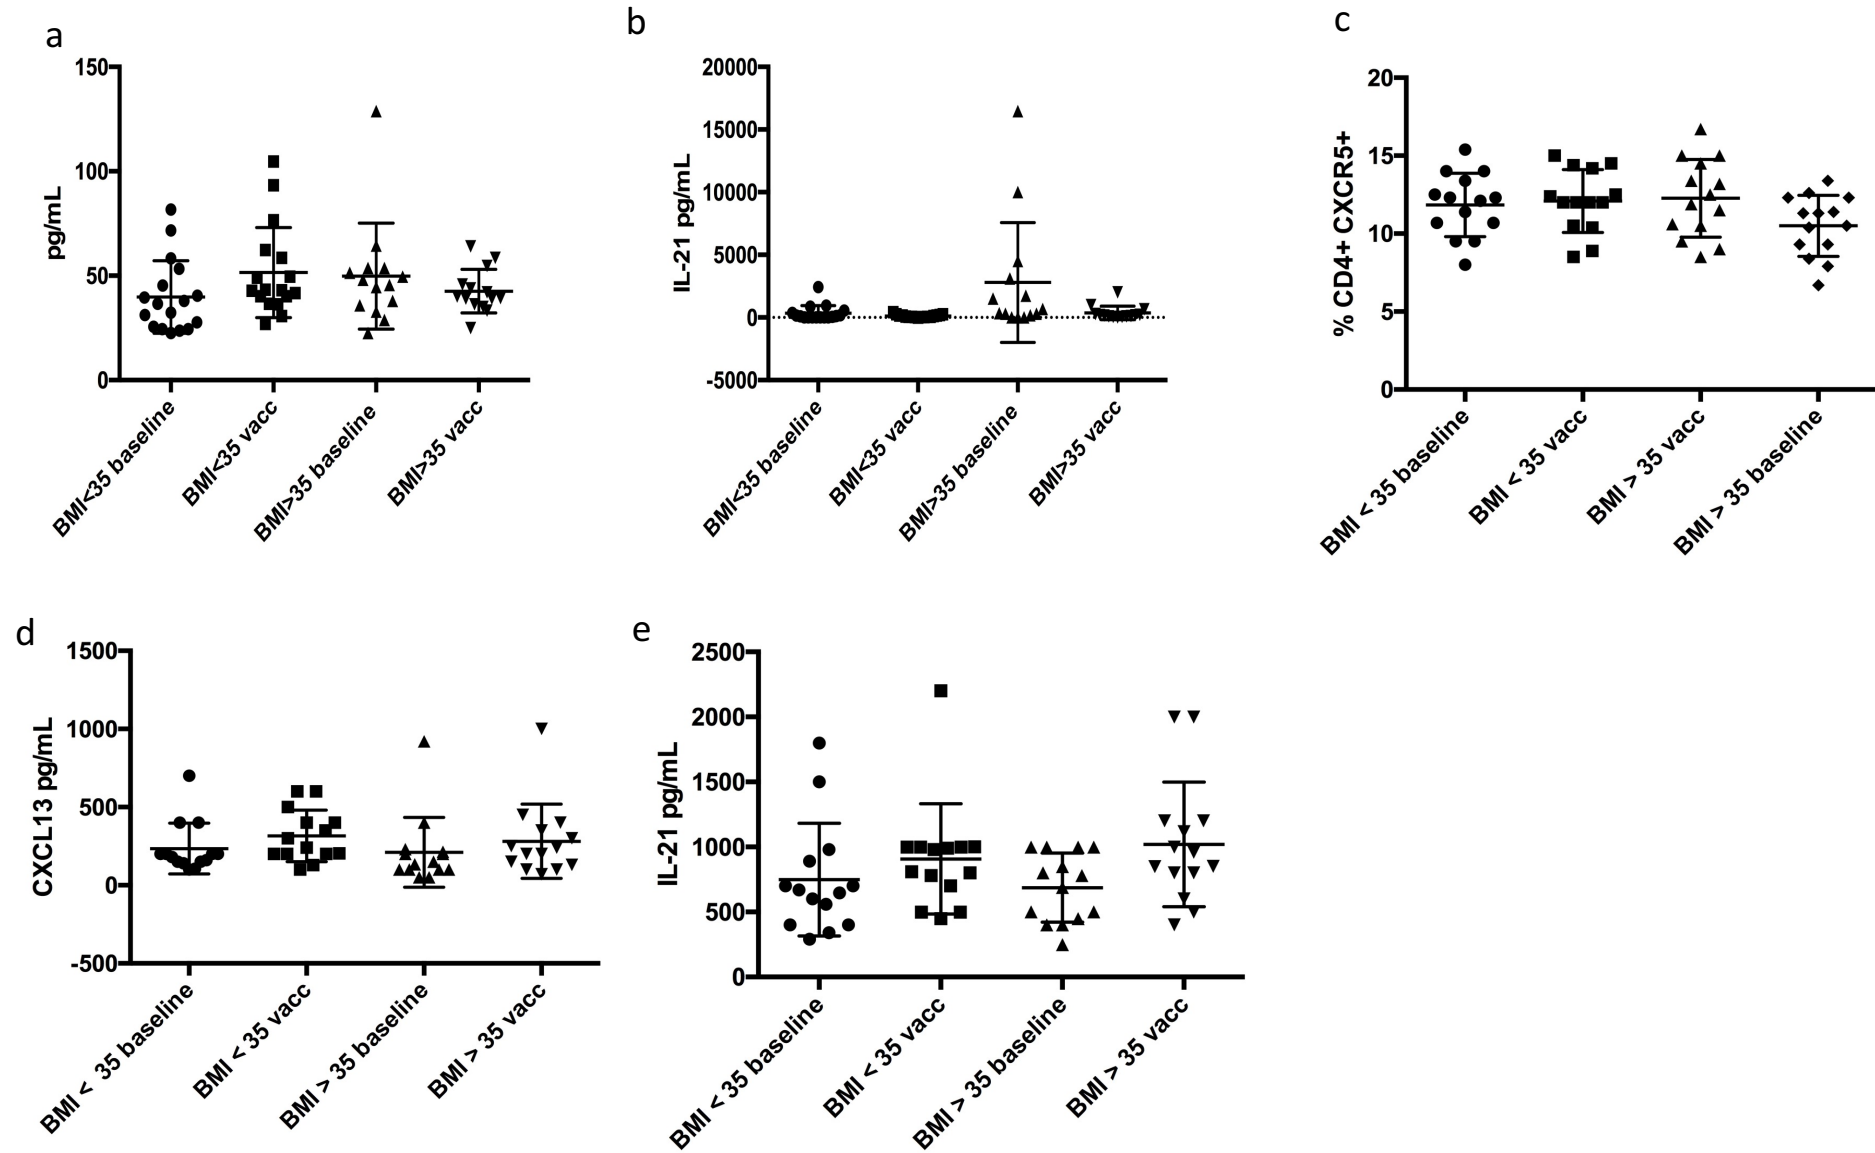

a. Serum CXCL13 b. IL-21 c. % pTFH cells in NAFLD patients with BMI<35 and BMI>35 at baseline vs. vaccination d. HBsAg specific CXCL13 levels e. IL-21 levels in co-cultured cell supernatants in NAFLD patients with BMI< 35 and BMI>35

## Supplementary Figure 4

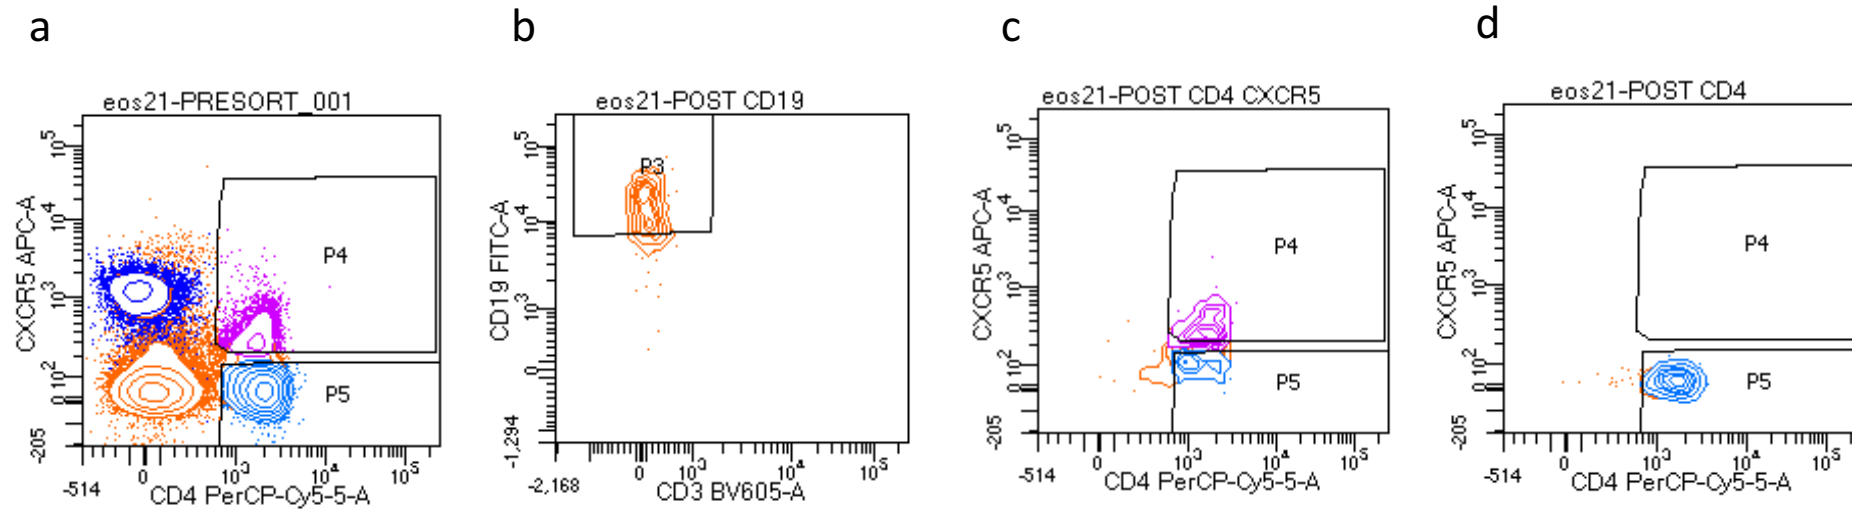

Representative plots of CD4+CXCR5+ cells, (a) pre and (b,c,d) post sort
